# Supplementary material for: NTRK1 Fusion in Glioblastoma Multiforme
Source: PubMed Central journal article supplement (PMC3960150; doi:10.1371/journal.pone.0091940), 2014-03-19
Supplement: pone.0091940.s001.pdf [file pone.0091940.s001.pdf]

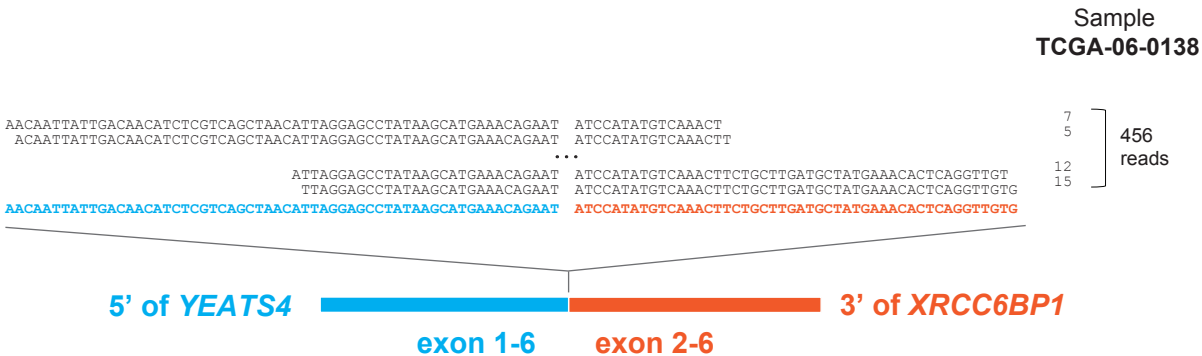

**Figure S1** *YEATS4-XRCC6BP1* fusion gene.
