# Supplementary material for: NTRK1 Fusion in Glioblastoma Multiforme
Source: PubMed Central journal article supplement (PMC3960150; doi:10.1371/journal.pone.0091940), 2014-03-19
Supplement: pone.0091940.s003.pdf [file pone.0091940.s003.pdf]

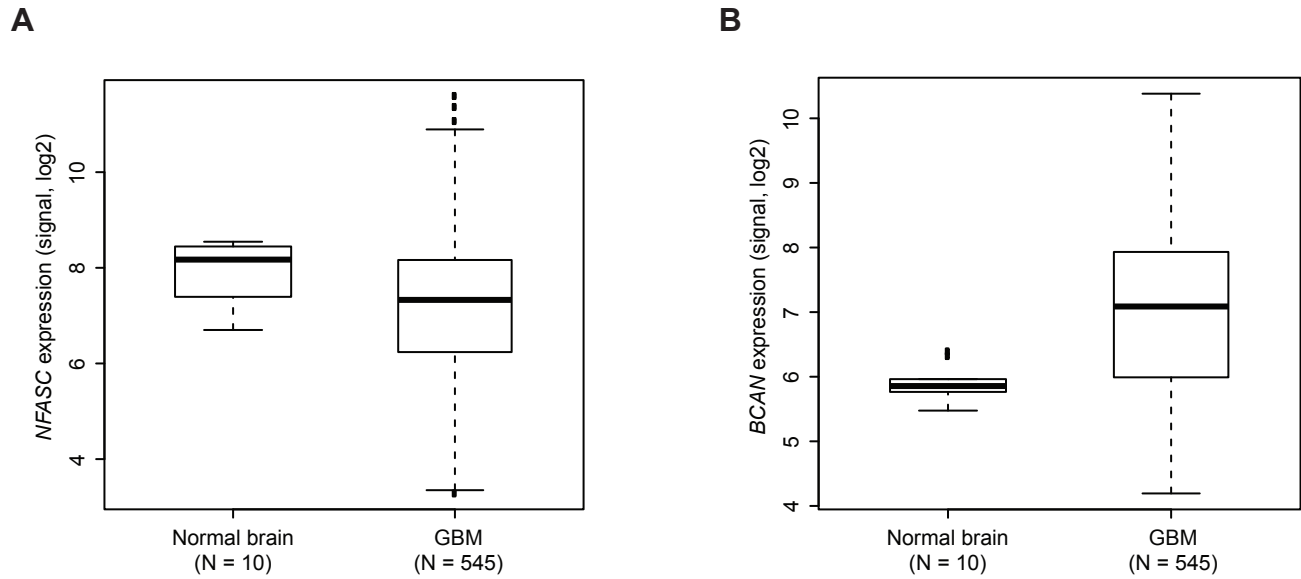

**Figure S3** Expression of *NFASC* and *BCAN* in normal brain and GBM. Expression of (A) *NFASC*, and (B) *BCAN* in normal brain (N = 10) and GBM (N = 545, from 526 patients) samples of the TCGA panel. Expression was measured using Affymetrix Human Genome U133A arrays.
