# Supplementary material for: NTRK1 Fusion in Glioblastoma Multiforme
Source: PubMed Central journal article supplement (PMC3960150; doi:10.1371/journal.pone.0091940), 2014-03-19
Supplement: pone.0091940.s005.pdf [file pone.0091940.s005.pdf]

|                 | TCGA-19-2619            | TCGA-06-5411             |              |
|-----------------|-------------------------|--------------------------|--------------|
| <i>NTRK1</i>    | fusion with <i>BCAN</i> | fusion with <i>NFASC</i> | RTK family   |
| <i>EGFR</i>     | 1.9 fold amplification  | 1.3 fold amplification   |              |
| <i>PDGFRA</i>   | -                       | -                        |              |
| <i>MET</i>      | -                       | -                        |              |
| <i>FGFR3</i>    | -                       | -                        |              |
| <i>PIK3CA</i>   | -                       | -                        | PI3K pathway |
| <i>PIK3R1</i>   | -                       | -                        |              |
| <i>PTEN</i>     | -                       | nonsense mutation        |              |
| <i>AKT3</i>     | -                       | -                        |              |
| <i>NF1</i>      | -                       | -                        | RAS pathway  |
| <i>BRAF</i>     | -                       | -                        |              |
| <i>TP53</i>     | -                       | -                        |              |
| <i>MDM2</i>     | -                       | -                        |              |
| <i>MDM4</i>     | -                       | 7.0 fold amplification   |              |
| <i>CDKN2A/B</i> | homozygous deletion     | homozygous deletion      | p53 pathway  |
| <i>CDKN2C</i>   | -                       | homozygous deletion      |              |
| <i>CDK4</i>     | -                       | -                        | RB pathway   |
| <i>CDK6</i>     | -                       | -                        |              |
| <i>CCND2</i>    | -                       | -                        |              |
| <i>RB1</i>      | -                       | -                        |              |
| <i>IDH1</i>     | -                       | -                        |              |

**Figure S5** Genetic alterations in major GBM driver genes and pathways in the two TCGA GBM samples with *NTRK1* fusion.
