# Supplementary material for: NTRK1 Fusion in Glioblastoma Multiforme
Source: PubMed Central journal article supplement (PMC3960150; doi:10.1371/journal.pone.0091940), 2014-03-19
Supplement: pone.0091940.s006.pdf [file pone.0091940.s006.pdf]

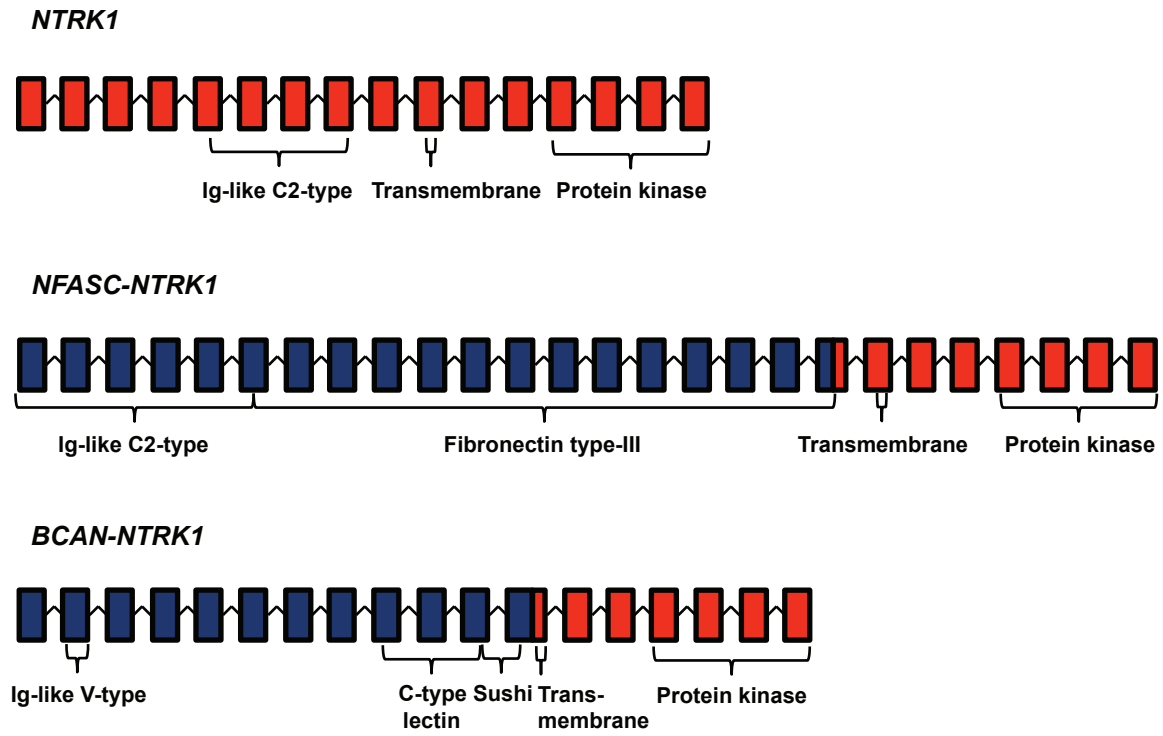

**Figure S6** Domain structure of *NTRK1* and the two *NTRK1* fusion genes found in GBM.
